# Supplementary material for: Cell-Mediated Immune Responses to in vivo-Expressed and Stage-Specific Mycobacterium tuberculosis Antigens in Latent and Active Tuberculosis Across Different Age Groups
Source: Front Immunol. 2020 Feb 11;11:103. doi: 10.3389/fimmu.2020.00103 (PMC7026259; doi:10.3389/fimmu.2020.00103)
Supplement: Supplementary file 1 [file Table_1.xlsx]

## Sheet: Supplementray Table 1
Supplementary Table 1: Multicomponent cytokine signatures in the supernatants of diluted whole blood after Mtb antigen stimulation
Stimuli	TNF-α		GM-CSF		IP-10		IFN-γ		IL-17		IL-22		IL-32		IL-10
	p-value	median	p-value	median	p-value	median	p-value	median	p-value	median	p-value	median	p-value	median	p-value	median
unstimulated		3.342		14.18		16.91		47.27		4.549		9.81		2		3.4
PHA	2.40592e-10	569.9	2.40592e-09	2107	5.05243e-08	1188	3.60888e-09	12293	3.60888e-09	1251	4.13721e-05	30.33	7.21775e-09	561.8	1.80444e-07	9.38
PPD	2.40592e-10	121.4	2.40592e-09	227.5	5.18475e-06	409.2	3.60888e-09	1097	3.60887e-08	51.3	0.00031862	20.49	0.183367	19.81	0.0857559	5.54
Rv1733*	2.40592e-10	155.8	1.54749e-06	21.98	0.00158229	36.63	2.69463e-06	64.63	2.46905e-05	10.75	0.266309	8.73	0.370111	2	0.495277	4.636
Rv2034*	3.79882e-10	86.64	0.000756662	14.18	0.00688648	36.37	0.000283552	47.27	0.00177322	9.63	0.105421	8.73	0.545734	2	0.55238	3.914
Rv1009*	2.40592e-10	237.6	5.05243e-08	31.74	0.0943274	26.84	0.023516	47.27	0.0267674	10.04	0.205676	13.26	0.901583	2	0.729962	4.49
Rv2032*	1.07417e-07	13.76	0.190858	14.18	0.307511	27.26	0.509719	47.27	0.0284463	10.2	0.697366	8.73	0.326318	2	0.729962	3.736
Rv2450*	0.0051451	7.07	0.146503	14.18	0.0724343	24.93	0.608744	47.27	0.524229	6.058	1	8.94	0.787218	2	0.800135	3.659
Rv3353*	0.205454	3.721	0.0570237	14.18	0.263466	25.05	0.756671	47.27	0.363433	4.124	0.915267	8.731	1	2	0.936805	3.54
E/C	6.87405e-10	61.87	1.05475e-05	37.03	5.18475e-06	95.93	0.000126673	82.5	0.000114692	14.32	0.226006	13.19	0.370111	11.65	0.135341	4.76
Rv0066	0.00202273	5.471	0.292286	14.18	0.648351	26.21	0.847502	47.27	0.28527	6.114	0.899613	8.73	0.713835	2	0.351934	3.94
Rv0287/88	1.25526e-09	27.76	0.000123372	14.18	2.3741e-05	92.15	0.000267503	55.94	0.0142145	10.2	0.352949	13.66	0.993833	2	0.495277	3.847
Rv0383	0.00148095	4.648	0.895083	14.18	0.499546	20.31	0.928518	47.27	0.457824	4.627	0.0423983	8.73	0.952431	2	0.988813	3.77
Rv0423	2.40592e-10	89.72	0.00048307	14.18	0.374106	27.37	0.114982	47.27	0.0139193	8.159	0.605605	8.73	0.952431	2	0.530852	3.41
Rv0440	2.40592e-10	167.7	0.000202151	15.1	2.3741e-05	63.96	0.00121126	47.27	0.273815	4.627	0.229505	8.73	0.609684	2	0.351934	5.08
Rv0467	0.000306531	4.823	0.620984	14.18	0.158277	22.78	0.951346	47.27	0.518466	6.706	0.0448887	8.73	0.517712	2	0.658663	3.438
Rv0468	5.55212e-09	13.14	0.410488	11.67	0.980649	21.86	0.928518	47.27	0.176706	5.91	0.526952	8.73	0.623589	2	0.988813	3.62
Rv0470	2.40592e-10	50.69	0.00034492	14.18	0.00125487	57.85	0.000140798	62.49	0.00019579	15.87	0.899613	9.67	0.713835	2	0.17368	4.374
Rv0501	5.55212e-09	14.48	0.563793	9.005	0.0456007	36.92	0.72261	39.09	0.363433	4.294	0.105421	8.73	0.635297	2	0.729962	3.56
Rv0640	0.00460851	7.07	0.173102	14.18	0.791817	20.72	0.957715	47.27	0.405546	4.48	0.0434998	8.73	0.165794	2	0.351934	3.306
Rv0642	2.40592e-10	106.2	8.78961e-07	33.76	0.374106	17.09	0.03051	47.27	0.112853	5.051	0.055109	8.73	0.713835	2	0.800135	3.62
Rv0645	0.0437118	5.779	0.934082	14.18	0.880871	19.26	0.928518	47.27	0.800347	4.145	0.0191888	8.73	0.635297	2	0.351934	3.269
Rv0824	6.64908e-08	9.492	0.261647	14.18	0.0021867	32.06	0.44124	47.27	0.176706	8.712	0.123596	12.21	0.713835	2	0.799282	3.618
Rv0826	2.40592e-10	244.8	2.26844e-07	26.43	0.115739	27.33	0.0325543	47.27	0.112784	7.628	0.855667	8.731	0.517712	2	0.495277	4.74
Rv0867	0.00202273	7.07	0.326356	14.18	0.97353	19.75	0.419361	47.27	0.212423	10.2	0.956575	8.73	0.165794	2	0.600267	4.3
Rv0991	2.40592e-10	199.3	0.000133895	16.38	0.791817	23.99	0.00478587	47.27	0.0165816	10.2	0.410722	12.28	0.165794	2	0.351934	4.243
Rv1038	0.0949085	7.07	0.0837178	14.18	0.0371129	28.92	0.847502	47.27	0.273815	10.2	0.899613	8.73	0.558433	2	0.373307	4.21
Rv1131	1.5037e-09	34.11	0.00502232	14.18	0.572358	25.47	0.11941	47.27	0.0198968	10.2	0.899613	8.73	0.713835	2	0.495277	4.123
Rv1221	2.40592e-10	185.1	6.099e-07	28.18	0.527231	22.24	0.0490248	47.27	0.0536697	8.862	0.956575	8.731	0.326318	2	0.638532	4.18
Rv1284	0.0118251	7.066	0.341423	14.18	0.5472	24.56	0.928518	47.27	0.131773	10.2	0.615568	8.73	0.159503	2	0.812712	3.659
Rv1390	3.96976e-08	16.7	0.295773	14.18	0.406046	20.27	0.0718994	47.27	0.111139	10.2	0.352949	8.73	0.183367	2	0.988813	3.914
Rv1479	0.0149463	7.07	0.1265	14.18	0.0520214	17.08	0.72261	47.27	0.457824	10.2	0.226006	8.73	0.950302	2	0.729962	4.194
Rv1738	1.14758e-05	7.07	0.652231	14.18	0.0794209	26.34	0.346642	47.27	0.112784	10.2	0.807689	9.475	0.726683	2	0.495277	4.03
Rv1791	0.000626346	7.07	0.0528201	14.18	0.374106	25.46	0.617108	47.27	0.0953259	8.869	1	8.731	0.848419	2	0.495277	3.62
Rv1792	0.000407611	7.07	0.0402923	14.18	0.00688648	33.62	0.0115628	47.27	0.065675	10.2	0.733407	10.51	0.726683	2	0.373307	4.9
Rv1846	0.0168054	7.07	0.173102	14.18	0.333234	13.65	0.957715	47.27	0.102322	10.2	0.965407	8.73	0.336571	2	0.800135	3.792
Rv1872	3.79882e-10	79.36	0.000257366	14.19	0.326835	27.39	0.023516	47.27	0.0139193	10.2	0.807689	8.73	0.567885	2	0.547832	4.341
Rv1980	3.79882e-10	130.9	1.5879e-07	44.84	0.000662821	60.67	1.27032e-06	182.5	7.71577e-06	15.13	0.105421	16.68	0.982052	2	0.351934	4.88
Rv2007	0.330505	7.07	0.261647	14.18	0.527231	18.92	0.398015	47.27	0.212789	10.2	0.697366	8.73	0.726683	2	0.630447	4.03
Rv2031	0.000497089	7.07	0.275665	14.18	0.0166778	28.77	0.164675	47.27	0.102322	10.2	0.697366	8.73	0.326318	2	0.645403	4.11
Rv2215	7.21775e-09	27.37	0.138127	14.18	0.327457	27.09	0.0264667	47.27	0.0200006	9.605	0.0434998	8.73	0.977397	2	0.729962	3.54
Rv2245	9.84239e-10	28.98	0.0241446	14.18	0.0456007	29.09	0.00478587	47.27	0.0103381	10.2	0.0692964	8.73	0.41165	2	0.729962	3.17
Rv2346/47	7.21775e-09	15.21	0.00106077	14.18	0.000281029	62.69	0.00176201	47.27	0.363433	7.667	0.697366	9.139	0.952431	2	0.839922	3.73
Rv2382	0.0189393	7.07	0.619069	14.18	0.766399	23.57	0.957715	47.27	0.334582	6.706	0.956575	8.73	0.517712	2	0.729962	3.736
Rv2389	2.40592e-10	159.6	5.7742e-08	30.87	0.0216802	27.17	0.00112705	47.27	0.0198968	10.2	0.259384	12.6	0.901583	2	0.495277	4.79
Rv2431	1.3907e-05	7.81	0.18705	14.18	0.450276	25.67	0.340934	47.27	0.930816	5.051	0.899613	9.105	0.326318	2	0.693017	3.97
Rv2461	2.40592e-10	58.46	0.00118861	15.17	0.649157	24.9	0.11941	47.27	0.258443	6.524	0.855667	8.814	0.545734	2	0.351934	4.37
Rv2626	0.0495126	5.584	0.652231	14.18	0.880871	20.95	0.617108	47.27	0.125259	10.2	0.861195	8.73	0.623589	2	0.638532	3.755
Rv2657	0.0628033	7.07	0.744586	14.18	0.00197228	14.77	1	47.27	0.457824	10.2	0.352949	8.73	0.713835	2	0.645403	3.785
Rv2710	0.00985437	7.07	0.779118	14.18	0.880871	21.42	0.869026	47.27	0.800347	4.888	0.105421	8.73	0.623589	2	0.736896	3.602
Rv2873	9.95552e-09	26.94	0.0571933	14.18	0.374106	25.34	0.327036	47.27	0.0550685	9.943	0.153724	8.73	0.500931	2	0.729962	3.663
Rv2941	0.0205345	7.07	0.652231	14.18	0.582062	24.05	0.928518	47.27	0.363433	8.93	0.0434998	8.73	0.57919	2	0.981582	3.42
Rv3048	0.0116614	7.07	0.295773	14.18	0.333234	19.01	0.637733	47.27	0.176706	10.2	0.0108419	8.73	0.713835	2	0.936805	3.541
Rv3052	2.06909e-08	16.7	0.295773	12.8	0.13059	26.18	0.58696	34.9	0.14401	6.086	0.872201	12.65	1	2	0.530852	3.62
Rv3407	0.0383105	5.029	0.0836363	14.18	0.0351101	14.22	0.869026	47.27	0.800347	4.073	0.807689	8.73	0.901583	2	0.729962	3.82
Rv3462	3.72529e-08	7.895	0.0836363	14.18	0.333234	22.63	0.847502	27.14	0.454176	4.386	0.733407	8.73	0.57919	2	0.600267	3.663
Rv3583	0.153429	3.381	0.415386	14.18	0.000720373	13.52	0.928518	47.27	0.97995	4.543	1	8.94	0.713835	2	0.955628	3.299
Rv3614/15	6.87405e-10	27.84	0.000288402	17.79	0.000281029	83.15	7.2326e-05	84.04	0.000214096	10.41	0.868097	9.139	0.726683	2	0.55238	3.677
Rv3615	3.79882e-10	26.12	0.000257366	16.31	3.2303e-05	104	1.15484e-06	100.2	7.71577e-06	12.56	0.352949	12.78	1	2	0.530852	3.855
Rv3616	2.40592e-10	479.2	2.40592e-09	51.13	0.000281029	82.55	1.92473e-08	190.3	0.000139678	15.28	0.213498	12.55	0.0649568	8.836	0.351934	5.547
Rv3846	0.000679205	7.07	0.0915264	14.18	2.3741e-05	36.76	0.191599	47.27	0.480378	6.058	0.189687	8.73	0.0826219	10.62	0.729962	4.21
Rv3865	2.40592e-10	161	1.81428e-06	24.34	0.000151633	43.29	0.000126673	49.29	7.97321e-05	10.2	0.668479	8.73	0.0649568	5.754	0.530852	5.07
Filled in blue are values significantly increased in stimulated compared to unstimulated samples (Mann‐Whitney U test with FDR multiple test correction). Colored in red are the median values which were below the median of the unstimulated samples.
